# Supplementary material for: Development of a targeted amplicon sequencing method for genotyping Cyclospora cayetanensis from fresh produce and clinical samples with enhanced genomic resolution and sensitivity
Source: Front Microbiol. 2023 Jun 16;14:1212863. doi: 10.3389/fmicb.2023.1212863 (PMC10311907; doi:10.3389/fmicb.2023.1212863)
Supplement: Supplementary file 2 [file Table_1.pdf]

**Table S1.** Markers in the targeted amplicon sequencing assay that overlap genome location with the eight loci MLST method for genotyping and number of SNP sites included.

| <b>MLST marker</b> | <b>TAS assay marker(s)</b> | <b>SNPs in MLST</b> | <b>SNPs in TAS assay</b> | <b>SNPs in common</b> |
|--------------------|----------------------------|---------------------|--------------------------|-----------------------|
| CDS1               | CA                         | 7                   | 12                       | 7                     |
| CDS2               | CB                         | 1                   | 2                        | 1                     |
| CDS3               | CC                         | 1                   | 2                        | 1                     |
| CDS4               | CD                         | 3                   | 4                        | 3                     |
| HC378              | CF, CJ                     | 17                  | 18                       | 17                    |
| HC360i2            | CE, CI                     | 24                  | 29                       | 20                    |
| MSR                | CG, CK                     | 5                   | 5                        | 5                     |
| MT-junction        | CH                         | NA                  | NA                       | NA                    |

NA = not applicable
